# Supplementary material for: Miniature all-solid-state heterostructure nanowire Li-ion batteries as a tool for engineering and structural diagnostics of nanoscale electrochemical processes
Source: Royal Society of Chemistry journal article supplement (doi:10.1039/c4nr01666a), 2014-01-01
Supplement: c4nr01666a1.pdf [file c4nr01666a1.pdf]

## Miniature all-solid-state heterostructure nanowire Li-ion batteries for nanoscale diagnosis of electrochemical processes

Vladimir P. Oleshko,<sup>\*a,d</sup> Thomas Lam,<sup>b</sup> Dmitry Ruzmetov,<sup>b,c</sup> Paul Haney<sup>b</sup>, Henri J. Lezec<sup>b</sup>, Albert V. Davydov,<sup>a</sup> Sergiy Krylyuk,<sup>a,c</sup> John Cumings<sup>d</sup>, and A. Alec Talin<sup>e</sup>

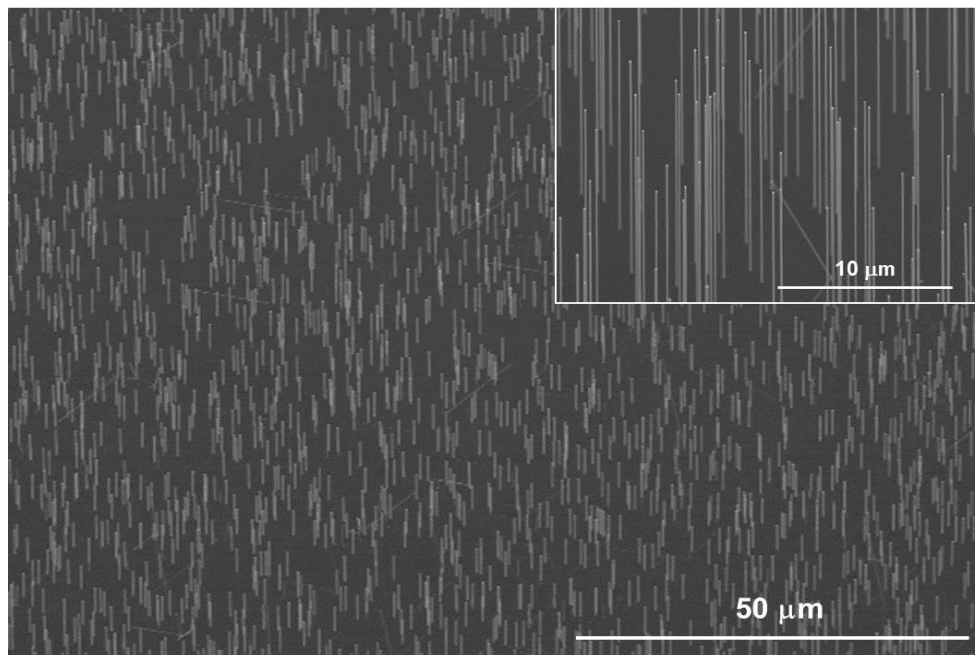

**Fig. S1.** FESEM, VLS-grown uniform single-crystalline Si NWs grown on a (111) Si wafer.

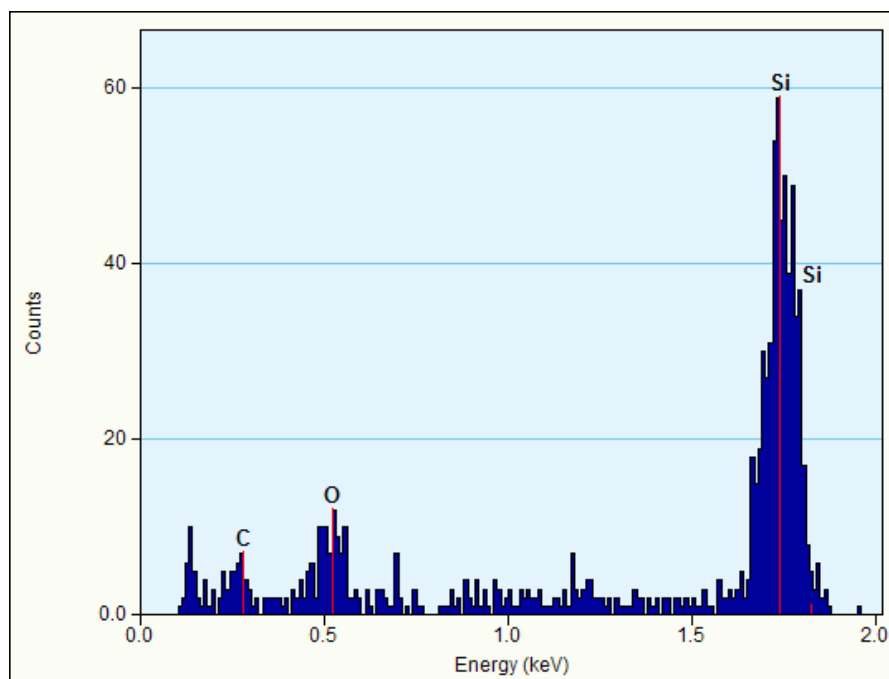

**Fig. S2.** X-ray spectrum acquired at the native oxide layer showing the Si-K peak at 1.74 keV and the O-K peak at 0.52 keV

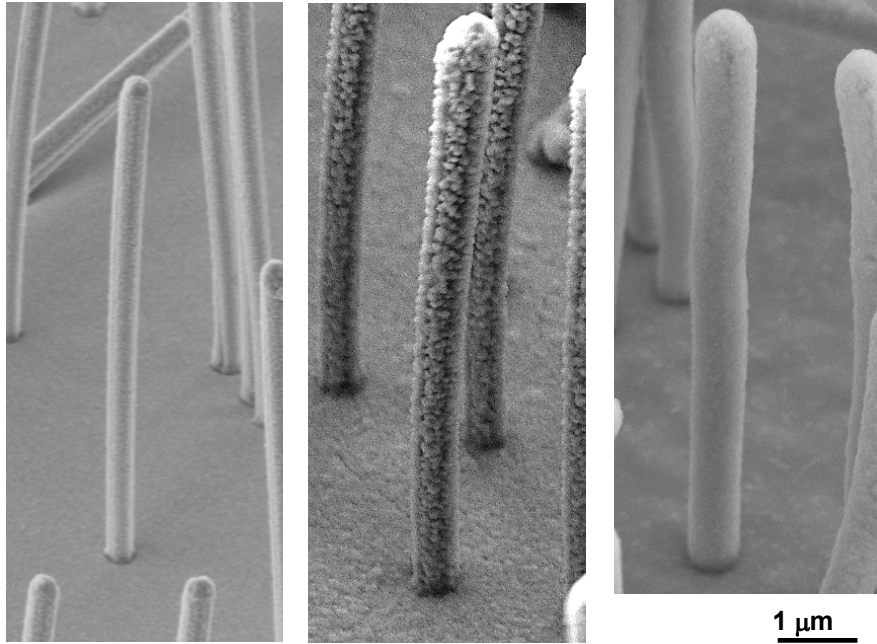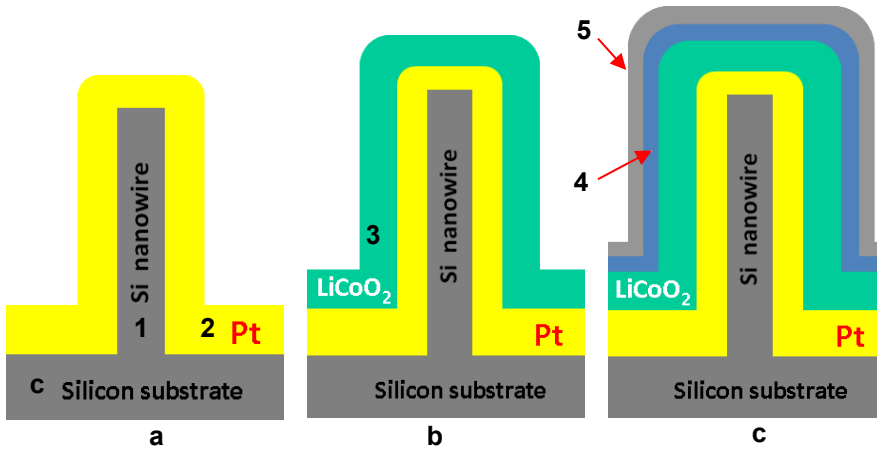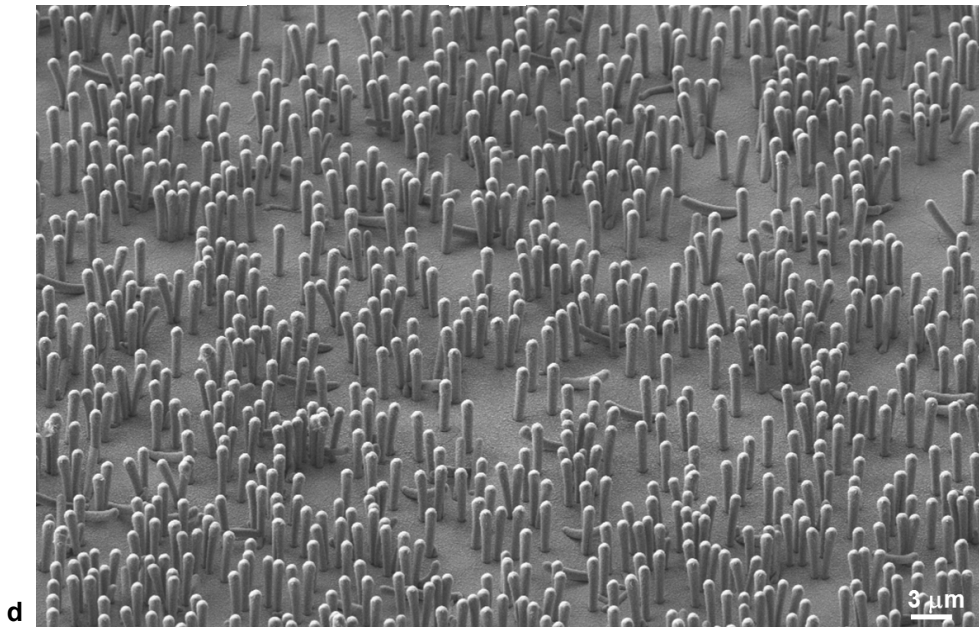

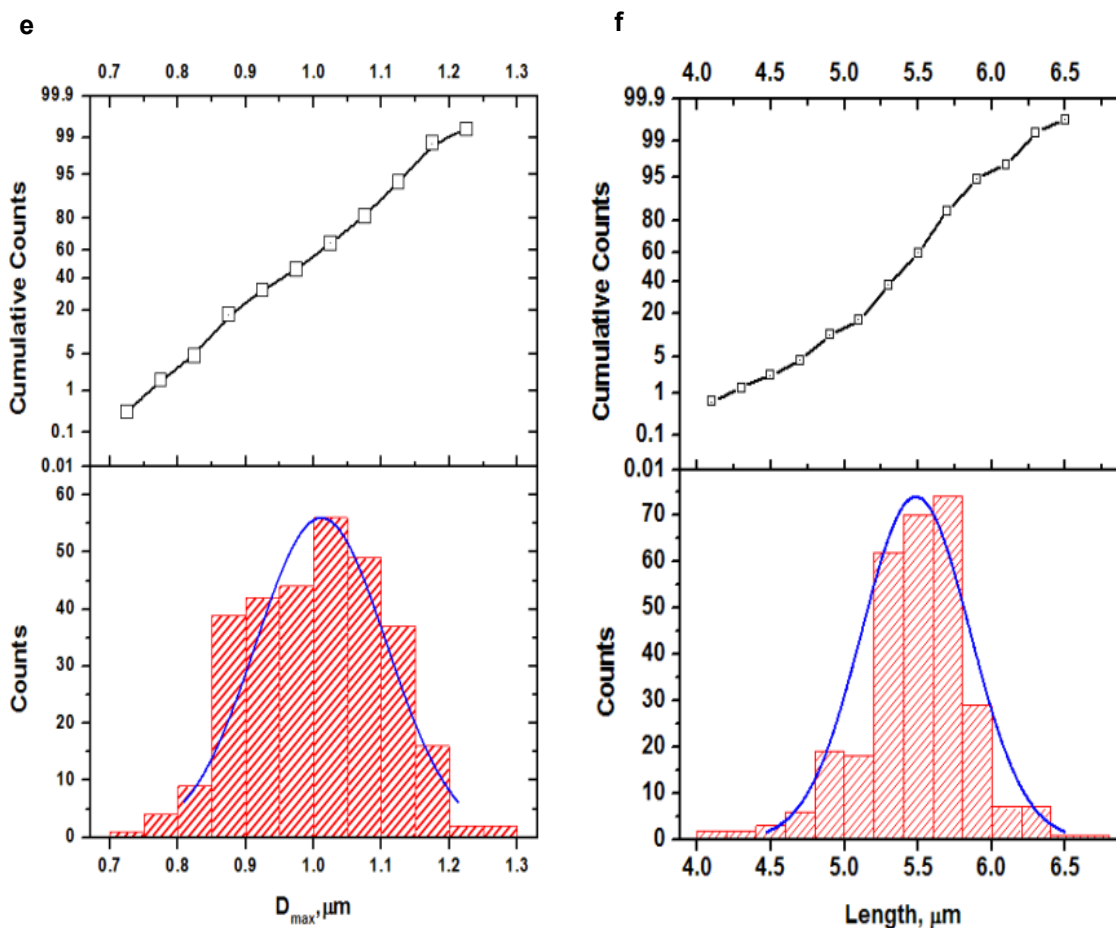

**Fig. S3.** Electron images and schematic illustrating different stages of battery fabrication. (a-c) FESEM, after deposition of an initial metal collector layer (a), after deposition of a  $\text{LiCoO}_2$  cathode layer (b), after deposition of a top  $n$ -Si amorphous anode layer (c). (d) Large field of view of as deposited NW-LiBs at  $45^\circ$  tilt and (e, f) cumulative and differential histograms on NW-LiB's maximum diameter ( $d_{\max}$ ) and length ( $l$ ) distributions, respectively,  $N = 300$  with the following statistical parameters:  $d_{\max}$  (mean =  $1.0 \mu\text{m}$ , SD =  $0.1 \mu\text{m}$ , min =  $0.75 \mu\text{m}$ , max =  $1.3 \mu\text{m}$ , range =  $0.5 \mu\text{m}$ , median =  $1.0 \mu\text{m}$ );  $l$  (mean =  $5.5 \mu\text{m}$ , SD =  $0.4 \mu\text{m}$ , min =  $4.2 \mu\text{m}$ , max =  $6.6 \mu\text{m}$ , range =  $2.5 \mu\text{m}$ , median =  $5.5 \mu\text{m}$ ). Blue line shows normal distribution curves with the same parameters.

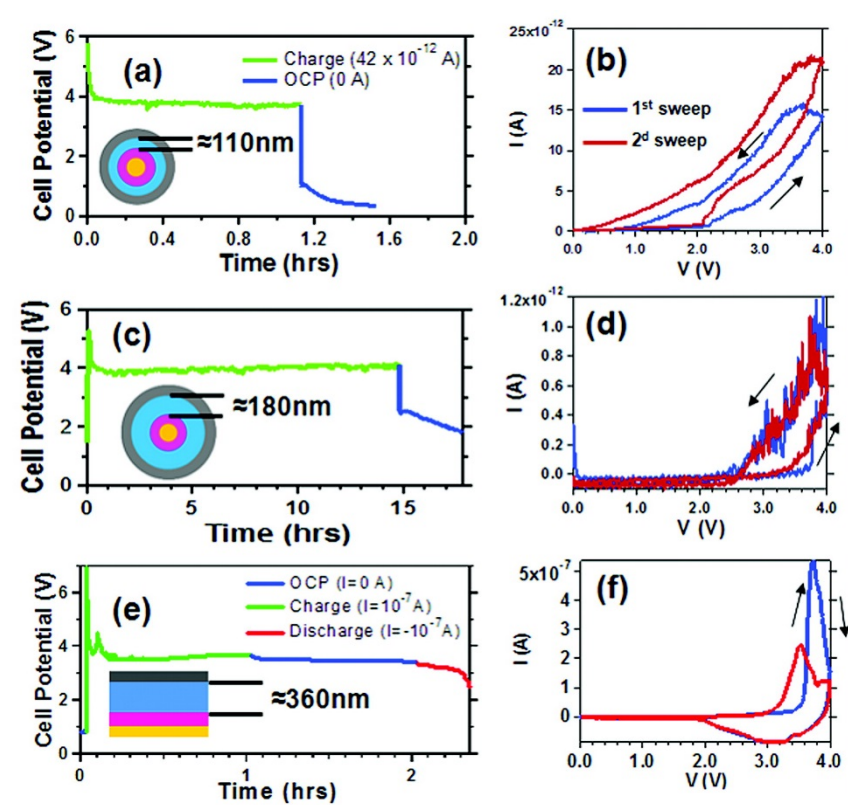

**Fig. S4.** Constant current charging – open circuit potential curves and (a) slow scan linear voltammetry  $I$ - $V$  characteristics; (b) a NW-LiB with 110 nm thick LiPON; (c, d) a NW-LiB with 180 nm thick LiPON; and (e, f) a thin film LiB with 360 nm thick LiPON (discharge shown in red)<sup>37</sup>. The voltage scan rate for  $I$ - $V$  curves is 0.16 mV/s. Copyright © 2012 American Chemical Society. Reproduced by permission.

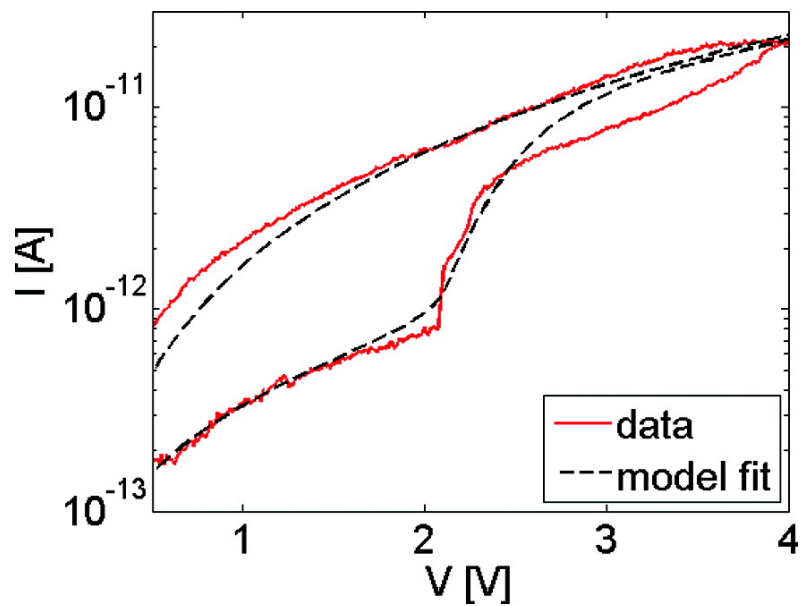

**Fig. S5.** Measured vs. calculated  $I$ - $V$  characteristics for the NW-LiB with LiPON  $\approx$  110 nm (same data as in Fig. S4b)<sup>37</sup>. Model parameters are:  $N_c = 2 \times 10^{19} \text{ cm}^{-3}$ ,  $n_0 = 3.5 \times 10^{16} \text{ cm}^{-3}$ ,  $\mu = 4.5 \times 10^{-9} \text{ cm}^2/\text{V}\cdot\text{s}$ ,  $N_t = 10^{18} \text{ cm}^{-3}$ ,  $\delta = 32$ ,  $l = 10$ . Copyright © 2012 American Chemical Society. Reproduced by permission.

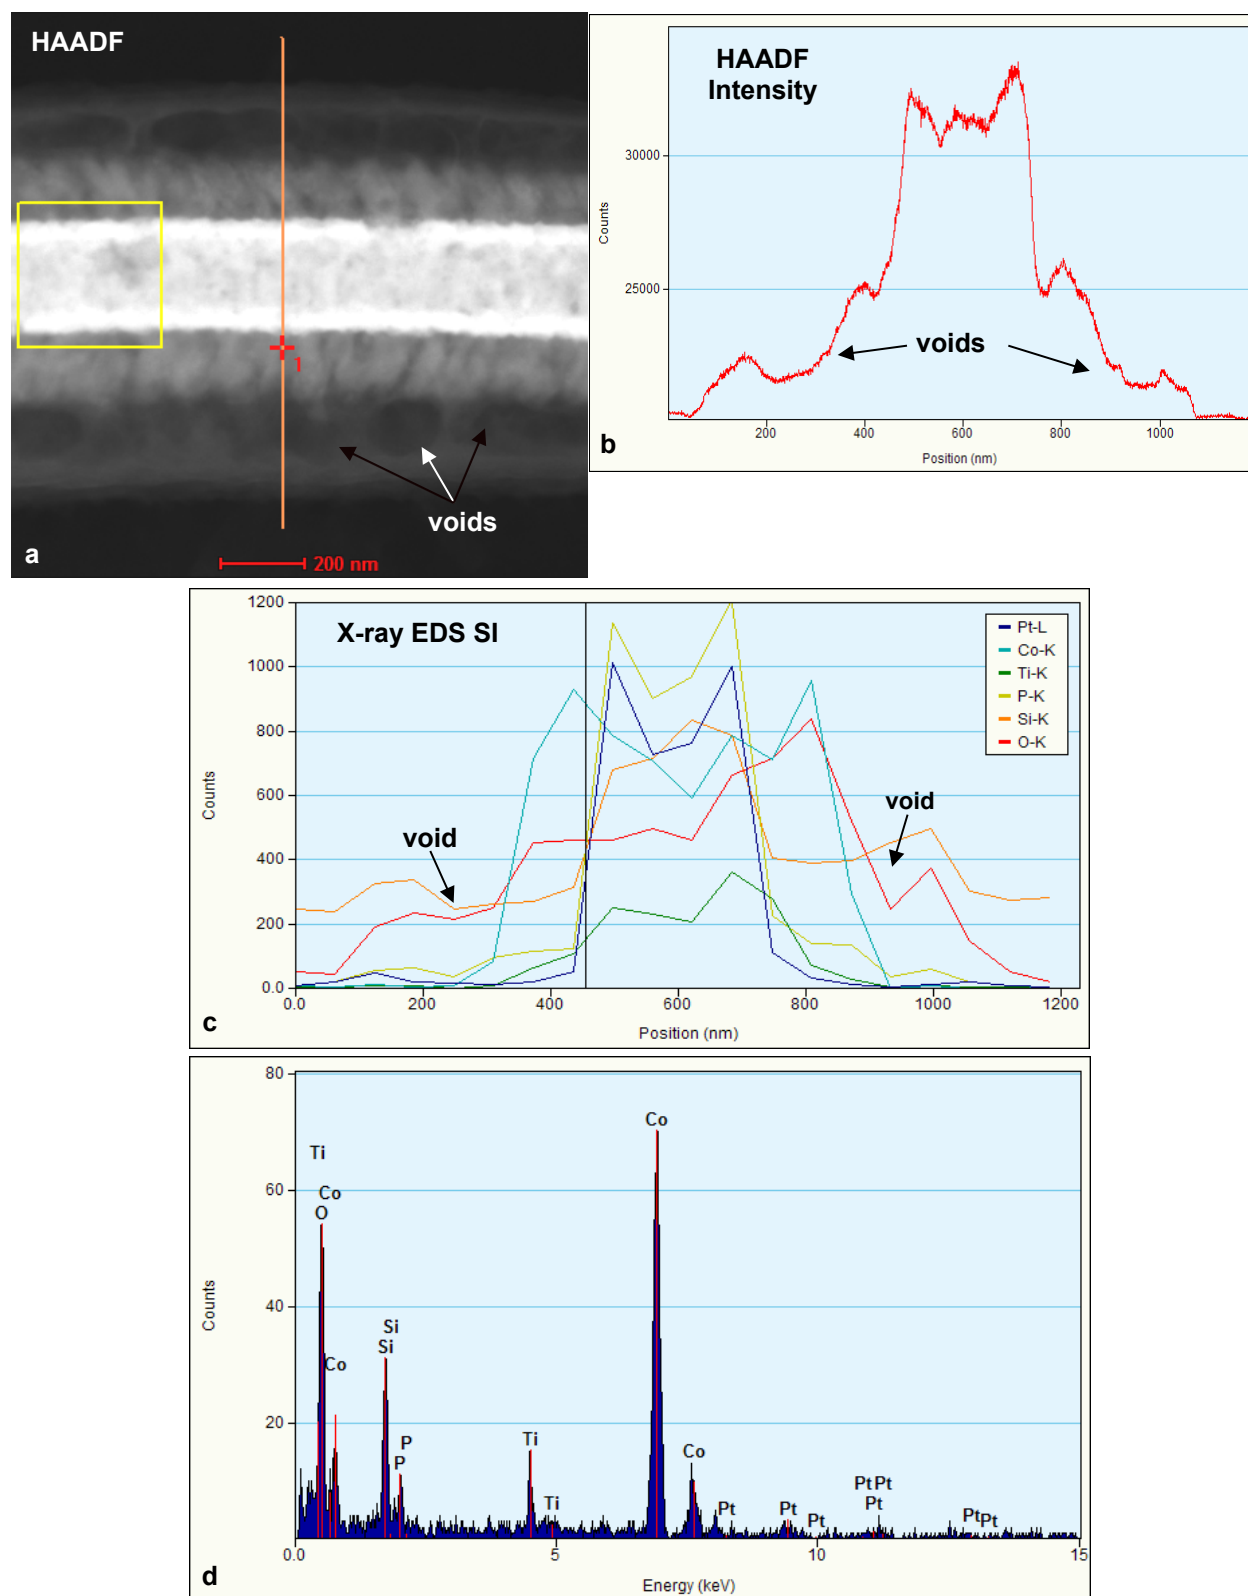

**Fig. S6.** (a) *Ex situ* HAADF STEM-EDX SI, the cycled NW-LiB, (b) 10 nm-wide HAADF-intensity profile along the orange line in (a), and (c) drift-corrected X-ray EDS SI line profile along the orange line in (a). (d) X-ray spectrum acquired in the point marked by red cross in (a). Note drops in intensities of phosphorus and oxygen X-ray lines at both LiPON-Li<sub>1-x</sub>CoO<sub>2</sub> interfaces.
